# Supplementary material for: Effects of different carbon-to-nitrogen (C/N) ratios and dissolved oxygen (DO) concentrations on denitrification performance and structure of microbial community in a moving bed biofilm reactor (MBBR)
Source: Royal Society of Chemistry journal article supplement (doi:10.1039/d5ra02142a), 2025-01-01
Supplement: d5ra02142a1.pdf [file d5ra02142a1.pdf]

## Supplementary Material

Table S1 details the operation conditions and denitrification performance of the bioreactor in different stages.

**Table S1**  
Operating condition and performance of the MBBR.

| Stages                            | 1         | 2         | 3         | 4         | 5         |
|-----------------------------------|-----------|-----------|-----------|-----------|-----------|
| Time (d)                          | 1–8       | 9–16      | 17–24     | 25–32     | 33–40     |
| HRT (h)                           | 24        | 24        | 24        | 24        | 24        |
| C/N                               | 12        | 12        | 5         | 5         | 12        |
| DO (mg/L)                         | 0.6       | 0.6       | 0.6       | 3.0       | 3.0       |
| Inf-nitrate (mg/L)                | 102.5±2.3 | 100.3±1.9 | 101.1±1.6 | 100.6±1.3 | 101.3±1.2 |
|                                   | 3         | 0         | 2         | 3         | 7         |
| Nitrate removal (%)               | 100±2.81  | 97.8±1.60 | 99.0±0.23 | 68.6±1.60 | 100±0.10  |
| COD removal (%)                   | 96.7±1.54 | 73.2±7.29 | 97.1±0.58 | 96.8±0.61 | 96.3±0.49 |
| Nitrite production (mg/L)         | 0.05±0.00 | 0.02±0.00 | 0.04±0.00 | 32.3±1.52 | 0.02±0.00 |
|                                   | 2         | 1         | 1         |           | 1         |
| <b>Ammonium</b> production (mg/L) | 0.75±0.03 | 0.84±0.02 | 0.91±0.05 | 0.87±0.03 | 0.78±0.04 |
| Samples                           | T0        | T1        | T2        | T3        | T4        |

Table S2 describes the measurement methods of various water quality indexes in the test.

**Table S2**  
The index and analytical methods of water quality

| Determination index | Determination method                                             |
|---------------------|------------------------------------------------------------------|
| Biomass (OD600)     | Turbidity method                                                 |
| pH                  | pH meter (PB-10, Sartorius, Germany)                             |
| Nitrate             | Phenol sulfonic acid method                                      |
| Nitrite             | <i>N</i> -(1-naphthalene)-diaminoethane spectrophotometer method |
| <b>Ammonium</b>     | Nessler's reagent colorimetric method                            |
| TN                  | Alkaline persulfate oxidation method                             |
| COD                 | Potassium dichromate method                                      |
| DO                  | DO meter (HI98193, HANNA, Italy)                                 |

Fig. S1 showed the contrast images of the biofilm carrier before and after biofilm

formation. As depicted in the images, the surface of the biofilm in the experimental group was covered with a large number of microorganisms (Fig. S1(b)) compared with the original biofilm sample (Fig. S1(a)).

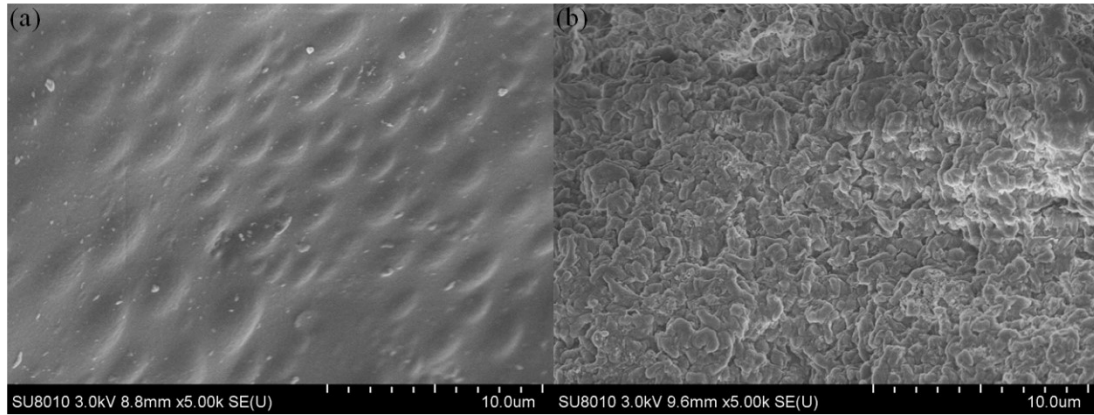

**Fig. S1.** SEM images of a sample of virgin surfaces of media (a) and media after biofilm formation (b).
